# Supplementary material for: U-Net Based Segmentation and Characterization of Gliomas
Source: MDPI journal article supplement (doi:10.3390/cancers14184457), 2022-09-14
Supplement: s1 [file s1]

**Table S1.** Feature list for model development.

|                                           |                                  |                                                 |                                                    |                                                |
|-------------------------------------------|----------------------------------|-------------------------------------------------|----------------------------------------------------|------------------------------------------------|
| Gender                                    | original_firstorder_TotalEnergy  | original_gldm_JointAverage                      | original_gldm_LowGrayLevelEmphasis                 | original_glszm_SizeZoneNonUniformity           |
| Age                                       | original_firstorder_Uniformity   | original_gldm_JointEnergy                       | original_gldm_SmallDependenceEmphasis              | original_glszm_SizeZoneNonUniformityNormalized |
| original_shape_SurfaceVolumeRatio         | original_firstorder_Variance     | original_gldm_JointEntropy                      | original_gldm_SmallDependenceHighGrayLevelEmphasis | original_glszm_SmallAreaEmphasis               |
| original_shape_VoxelVolume                | original_gldm_AutoCorrelation    | original_gldm_MCC                               | original_gldm_SmallDependenceLowGrayLevelEmphasis  | original_glszm_SmallAreaHighGrayLevelEmphasis  |
| original_firstorder_10Percentile          | original_gldm_ClusterProminence  | original_gldm_MaximumProbability                | original_gldm_GrayLevelNonUniformity               | original_glszm_SmallAreaLowGrayLevelEmphasis   |
| original_firstorder_90Percentile          | original_gldm_ClusterShade       | original_gldm_SumAverage                        | original_gldm_GrayLevelNonUniformityNormalized     | original_glszm_ZoneEntropy                     |
| original_firstorder_Energy                | original_gldm_ClusterTendency    | original_gldm_SumEntropy                        | original_gldm_GrayLevelVariance                    | original_glszm_ZonePercentage                  |
| original_firstorder_Entropy               | original_gldm_Contrast           | original_gldm_SumSquares                        | original_gldm_HighGrayLevelRunEmphasis             | original_glszm_ZoneVariance                    |
| original_firstorder_InterquartileRange    | original_gldm_Correlation        | original_gldm_DependenceEntropy                 | original_gldm_LongRunEmphasis                      | original_ngtdm_Busyness                        |
| original_firstorder_Kurtosis              | original_gldm_DifferenceAverage  | original_gldm_DependenceNonUniformity           | original_gldm_LongRunHighGrayLevelEmphasis         | original_ngtdm_Coarseness                      |
| original_firstorder_Maximum               | original_gldm_DifferenceEntropy  | original_gldm_DependenceNonUniformityNormalized | original_gldm_LongRunLowGrayLevelEmphasis          | original_ngtdm_Complexity                      |
| original_firstorder_MeanAbsoluteDeviation | original_gldm_DifferenceVariance | original_gldm_DependenceVariance                | original_gldm_LowGrayLevelRunEmphasis              | original_ngtdm_Contrast                        |
| original_firstorder_Mean                  | original_gldm_Id                 | original_gldm_GrayLevelNonUniformity            | original_gldm_RunEntropy                           | original_ngtdm_Strength                        |
| original_firstorder_Median                | original_gldm_Idm                | original_gldm_GrayLevelVariance                 | original_gldm_RunLengthNonUniformity               | original_gldm_ShortRunHighGrayLevelEmphasis    |
| original_firstorder_Minimum               | original_gldm_Idmn               | original_gldm_HighGrayLevelEmphasis             | original_gldm_RunLengthNonUniformityNormalized     | original_gldm_ShortRunLowGrayLevelEmphasis     |

|                                                 |                                  |                                                    |                                               |                                                 |
|-------------------------------------------------|----------------------------------|----------------------------------------------------|-----------------------------------------------|-------------------------------------------------|
| original_firstorder_Range                       | original_glcmlcn_Idn             | original_gldm_LargeDependenceEmphasis              | original_glrlnm_RunPercentage                 | original_glszm_GrayLevelNonUniformity           |
| original_firstorder_RobustMeanAbsoluteDeviation | original_glcmlcn_Imc1            | original_gldm_LargeDependenceHighGrayLevelEmphasis | original_glrlnm_RunVariance                   | original_glszm_GrayLevelNonUniformityNormalized |
| original_firstorder_RootMeanSquared             | original_glcmlcn_Imc2            | original_gldm_LargeDependenceLowGrayLevelEmphasis  | original_glrlnm_ShortRunEmphasis              | original_glszm_GrayLevelVariance                |
| original_firstorder_Skewness                    | original_glcmlcn_InverseVariance | original_glszm_LowGrayLevelZoneEmphasis            | original_glszm_LargeAreaHighGrayLevelEmphasis | original_glszm_HighGrayLevelZoneEmphasis        |
| original_glszm_LargeAreaLowGrayLevelEmphasis    | original_glszm_LargeAreaEmphasis |                                                    |                                               |                                                 |

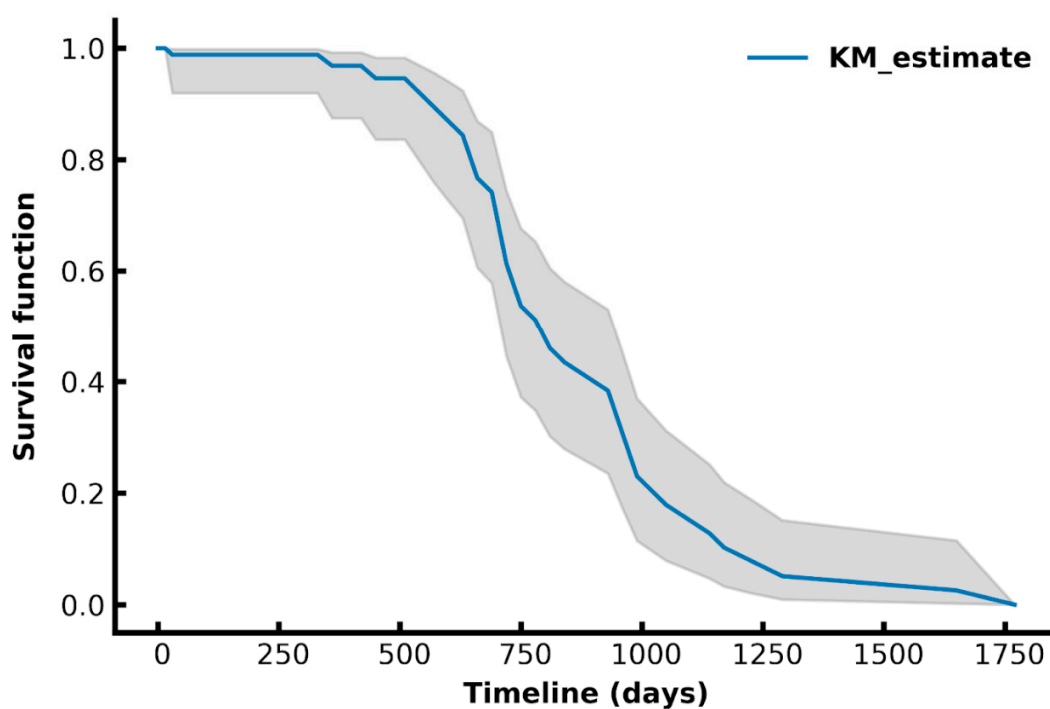

**Figure S1.** Kaplan Meier curve of survival estimation (MSH n = 89).
